# Supplementary material
Source: PubMed Central journal article supplement (PMC2787462)
Supplement: supp_122_24_4505__1.pdf [file supp_122_24_4505__1.pdf]

**Table S1. Lethality during development for three hemocyte-depleted lines**

| Genotype                                               | UAS/Balancer | TM6B/MKRS | UAS/Balancer<br>(axenic<br>conditions) | TM6B/MKRS<br>(axenic<br>conditions) |
|--------------------------------------------------------|--------------|-----------|----------------------------------------|-------------------------------------|
| <i>Hml-GAL4,UAS-GFP;</i><br><i>UAS-ced3(line#7-1)</i>  | 62 (228)     | 114       | 221 (240)                              | 120                                 |
| <i>Hml-GAL4,UAS-GFP;</i><br><i>UAS-ice(line#7-1)</i>   | 88 (296)     | 148       | 182 (208)                              | 104                                 |
| <i>Hml-GAL4,UAS-GFP;</i><br><i>UAS-ced3(line#12-5)</i> | 92 (390)     | 195       | 209 (224)                              | 112                                 |
| <i>Hml-GAL4,UAS-GFP;</i><br><i>UAS-ice(line#2-2)</i>   | 16 (262)     | 131       | 229 (252)                              | 126                                 |

Lethality during development observed for three hemocyte-depleted lines by counting the number of adult progeny with (a) both TM6B and MKRS balancers (TM6B/MKRS) on the third chromosome, or (b) one of the balancers and hence with the presence of a *UAS*-pro apoptotic construct *in trans* (UAS/Balancer, see below). The expected number of progeny appears in parenthesis.

The following cross was set up: *CyO/Hml-GAL4, UAS-GFP; TM6B/MKRS* × *CyO/IF; TM6B/UAS-pro-apoptotic gene*. For the progeny carrying *Hml-GAL4, UAS-GFP* on the second chromosome the expected ratios for the third chromosome were 2 *UAS-pro-apoptotic gene*/Balancer to 1 *TM6B/MKRS* (TM6B homozygous is embryonic lethal). In contrast to Mendelian expectations the observed ratios were

1:1.7 to 1.8 (when *UAS-ced#7-1* was used), 1:2.0 (when *UAS-ced3#12-5* was used) and in the most extreme case 1:8.2 (when *UAS-ice#2-2* was used). However, these skewed ratios were not observed when cultures were grown in axenic conditions in the presence of antibiotics. This indicated that lethality of haemocyte-ablated larvae was due to failure of the cellular arm of the immune system to respond to infection.
